# On the diversity of chemical power supply as a determinant of biological diversity

David Diego<sup>1,3</sup>, Bjarte Hannisdal<sup>1,3</sup>, and Håkon Dahle<sup>2,3,4</sup>

<sup>1</sup>*Department of Earth Science, University of Bergen, Allégaten, NO-5007 Bergen, Norway*

<sup>2</sup>*Department of Biological Sciences, University of Bergen, Thormøhlens gate 53A, NO-5006 Bergen, Norway*

<sup>3</sup>*K.G. Jebsen Centre for Deep Sea Research, Allégaten, NO-5007 Bergen, Norway*

<sup>4</sup>*Computational Biology Unit, Department of Informatics, University of Bergen, N-5020 Bergen, Norway*

## Abstract

Understanding how environmental factors shape biological communities is a fundamental problem in microbial ecology. Patterns of microbial diversity have been characterized across a wide range of different environmental settings, but the mechanisms generating these patterns remain poorly understood. Here, we use mathematical modelling to investigate fundamental connections between chemical power supply to a system and its biological diversity and community structure. We reveal a strong mechanistic coupling between biological diversity and the diversity of chemical power supply, but also find that different properties of power supply, such as substrate fluxes and flow and Gibbs energies of reactions, affect community structure in fundamentally different ways. Moreover, we show how simple connections between power supply and growth can give rise to complex patterns of biodiversity across physicochemical gradients, such as pH gradients. Our findings demonstrate the importance of taking into account energy fluxes in order to reveal fundamental connections between community structure and environmental variability, and to obtain a better understanding of microbial population dynamics and diversity in natural environments.

## 1 INTRODUCTION

Numerous studies have characterized microbial diversity patterns across different environmental settings. For example, pH has been found to be a good predictor of microbial diversity in soil [1, 2] and temperature is correlated with

5 marine planktonic bacterial richness on a global scale [3, 4], whereas salinity has  
6 been found to be correlated with microbial diversity in lake sediments [5], soil  
7 [2, 6] and estuaries [7, 8].

8 However, a major challenge in the field of microbial ecology is that our un-  
9 derstanding of the underlying dynamics generating such patterns remains very  
10 limited [9–13]. Theoretical analyses of models representing the dynamics of  
11 highly idealized communities have provided useful insights into the conditions  
12 that favour co-existence of species, e.g. in terms of substrate uptake kinet-  
13 ics, [14–17], top down control by grazers [18, 19], and metabolic conversion of  
14 common substrates [11]. Clearly, however, the biodiversity, structure and func-  
15 tioning of microbial communities depend not only on species co-existence, but  
16 also on species abundances. Hence, the dynamics of abundance is of critical  
17 importance to any mechanistic account of how environmental conditions shape  
18 microbial communities and their activity.

19 At a fundamental level, all organisms have a demand for energy, or power,  
20 in order to grow and multiply. In principle, the available power supply should  
21 therefore represent a basic environmental constraint on the abundance of species.  
22 If this principle holds, then we would expect a strong coupling between power  
23 supply and diversity in most environments, especially under energy limited con-  
24 ditions. Indeed, recent gene-centric analyses of oxygen minimum zones have  
25 found that fluxes of energy seem to be robust predictors of microbial produc-  
26 tivity and functional community structure [20, 21]. Moreover, in hydrothermal  
27 systems, the chemical energy landscapes emerging from mixing between reduced  
28 hydrothermal fluids and oxygenated cold seawater, seem to shape distributions  
29 of functional groups of bacteria and archaea [22, 23].

30 Environmental factors, such as pH, salinity and temperature, affect the  
31 Gibbs energies of chemical reactions, and thus modulate the chemical power

supply utilized by microbial communities [24, 25]. Part of the variation in biodiversity observed along physicochemical gradients, such as pH gradients, may therefore ultimately be linked to how those gradients affect energy landscapes.

Revealing the exact connections between chemical power supply and microbial diversity through analyses of natural environments is extremely challenging due to the high complexity and high number of unknown processes occurring in biological systems. For example, fluxes of substrate are often difficult to quantify, and extensive co-variation of variables makes it notoriously difficult to pinpoint causal effects.

An alternative to exploring natural environments is to use a theoretical modelling approach, which makes it possible to isolate the mechanistic relationship between power supply and diversity in highly idealized communities. We stress that although such models do not mimic real systems in detail, they enable us to represent basic principles in a reproducible way and to formulate testable hypotheses.

In this work, we analyse a simple population dynamics model, where growth rates are determined by maintenance powers, uptake rates of substrates, and the Gibbs energy associated with the oxidation of these substrates. We provide a thorough mathematical analysis of the relationship between biological diversity and chemical power supply in an energy limited environment. In particular, we demonstrate that complex diversity patterns along various chemical gradients can emerge from simple connections between power supply and growth. Our mathematical framework for relating chemical power supply and cellular abundances rests on fundamental thermodynamic principles.

## 56 MATERIALS AND METHODS

### 57 *The model*

58 We consider an idealized system, where species grow independently from each  
 59 other on one limiting substrate each (Fig. 1). Hence, there is no competition  
 60 for energy sources and no species-species interactions arising from food webs.  
 61 We label consumers and substrates as  $\{1, \dots, N\}$  such that the  $i$ -th consumer  
 62 absorbs the  $i$ -th substrate. At any given instant of time  $t$ ,  $c_i(t)$  will denote the  
 63 number of consumers of type  $i$  per unit volume present at that time. We take  
 64  $c_i$  to have units of  $cm^{-3}$ . Similarly,  $s_i(t)$  will denote the amount of substrate  
 65 of type  $i$  (measured in  $mol$ ) per unit volume, so that  $s_i(t)$  has units of  $mol \cdot$   
 66  $cm^{-3}$ . Limiting substrates enter the system at fixed rates. Cellular substrate  
 67 uptake rates depend on substrate concentrations in the system, and are modelled  
 68 according to Michaelis-Menten kinetics as:

$$\rho_i(s_i) = r_i \frac{s_i}{k + s_i}, \quad (1)$$

69 where  $r_i$  ( $mol \cdot s^{-1}$ ) denotes the maximum uptake rate and  $k$  ( $mol \cdot cm^{-3}$ )  
 70 is the half-saturation concentration<sup>1</sup>, that is:  $\rho_i(k) = r_i/2$ . Once absorbed  
 71 by a cell, the  $i$ -th substrate ( $S_i$ ) undergoes a chemical reaction of the type  
 72  $n_i S_i + a_1 A_1 + a_2 A_2 + \dots + a_n A_n \longrightarrow b_1 B_1 + b_2 B_2 + \dots b_m B_m$ , with  $A_1, \dots, A_n$   
 73 denoting any other reactants than  $S_i$  and  $B_1, \dots, B_m$  denoting products. The  
 74 corresponding stoichiometric numbers are denoted by  $n_i$  and  $a_1, \dots, a_n$  and  
 75  $b_1, \dots, b_m$ , respectively. The Gibbs energy of the chemical reaction for each mole  
 76 of the substrate of type  $i$ ,  $\Delta G_r^i$ , in turn depends on the substrate concentration  
 77 as

---

<sup>1</sup>In order to reduce the multiplicity of constants, we take a common value for the half-saturation constant.

$$\Delta G_r^i = \Delta G_i^0 + RT \ln Q, \quad (2)$$

where  $\Delta G_i^0$  denotes the standard free Gibbs energy for the reaction,  $R$  is the ideal gas constant and  $T$  is the temperature. Moreover,  $Q$  denotes the reaction coefficient given by

$$Q = \frac{\prod (\gamma_j [B_j])^{b_j/n_i}}{\gamma_{s_i} s_i \prod (\gamma_k [A_k])^{a_k/n_i}}, \quad (3)$$

where  $[\cdot]$  denotes the concentration (and hence  $s_i = [S_i]$ ) and  $\gamma_{(\cdot)}$  is the activity coefficient for the reactant/product. Letting the activity coefficients be constant for all reactants and products, and letting the concentrations be constant for all products and reactants, except for  $s_i$ , we have that  $\Delta G_r^i = \Delta G_i^0 - RT \ln s_i + K_i$ , where  $K_i$  is the constant  $RT \ln \frac{(\prod \gamma_j [B_j])^{b_j/n_i}}{\gamma_i (\prod \gamma_k [A_k])^{a_k/n_i}}$ . If we define an effective standard Gibbs energy as  $\Delta G_{i\text{eff}}^0 = \Delta G_i^0 + K_i$ , the energy available from the  $i$ -th reaction, which is used as an energy source by the  $i$ -th consumer, is

$$E_i(s_i) = -\Delta G_r^i = E_i^0 + RT \ln s_i, \quad (4a)$$

$$E_i^0 = -\Delta G_{i\text{eff}}^0 > 0. \quad (4b)$$

The quantity  $E_i(s_i)$  will be referred to as the (instantaneous) substrate-specific reaction energy and hence  $E_i^0$  will be called the standard substrate-specific reaction energy.  $E_i^0$  will be taken as

$$E_i^0 = E^0 \mathcal{E}_i, \quad (5)$$

where  $E^0$  can be interpreted as the basic energy scale for the considered en-

93 vironment while  $\mathcal{E}_i$  is a dimensionless factor taking into account the (possible)  
 94 variability of  $E_i^0$  across consumers. Although values of  $E_i^0$  will rarely change  
 95 with a common factor for all energy yielding reactions along a chemical gradi-  
 96 ent, settings with high  $E^0$  can be associated with environments where negative  
 97 values of  $\Delta G^0$  are typically high. Hence,  $E^0$  levels will typically be lower in  
 98 anaerobic environments than in aerobic environments. However, the  $E^0$  level is  
 99 also influenced by the overall chemical composition of a system so that different  
 100  $E^0$  levels may also be found along chemical gradients. As an example, consider  
 101 the oxidation of lactate with sulfate as electron acceptor ( $2 \text{ Lactate} + \text{SO}_4^{2-} \rightarrow 2$   
 102  $\text{Acetate} + 2 \text{HCO}_3^- + \text{H}_2\text{S}$ ), which has a standard Gibbs energy of -85.3 kJ/mol  
 103 (calculated with the ‘CHNOSZ’ package in R [26]). Assuming that the activity  
 104 coefficient of each reactant or product is one,  $E^0$  will shift from 236 kJ/mol in a  
 105 high energy setting (acetate =  $10^{-3}$  mM;  $\text{HCO}_3^- = 0.1$  mM;  $\text{H}_2\text{S} = 0.1$  mM;  
 106  $\text{SO}_4^{2-} = 50$  mM) to 138 kJ/mol in a low energy setting (acetate = 50 mM;  
 107  $\text{HCO}_3^- = 20$  mM;  $\text{H}_2\text{S} = 10$  mM;  $\text{SO}_4^{2-} = 10$  mM). The same chemical varia-  
 108 tions would have similar effects on  $E^0$  values associated with other substrates  
 109 used by sulfate reducers, such as propionate, butyrate, and ethanol.

110 We assume in our model that all organisms have a maintenance power de-  
 111 mand,  $P_i$  with units  $J \cdot s^{-1}$ . As in several previous studies [27–29], maintenance  
 112 power is defined here as the power necessary to perform all cellular processes  
 113 except for growth. This includes power used in spilling reactions [30–32] and  
 114 power spent on ‘useful’ functions (e.g. motility). How fast the population of  
 115 the  $i$ -th species grows depends on the power available for new biomass produc-  
 116 tion. This power is the difference between the substrate-consumption power  
 117  $E_i(s_i)\rho_i(s_i)$ , and maintenance power  $P_i$ . The rate of change in substrate con-  
 118 centrations in the system is defined by the flow of substrate in and out of the  
 119 system, as well as the rate of consumption of the substrate. This leads to the

120 following set of ODEs:

$$\dot{c}_i = \gamma_i [E_i(s_i)\rho_i(s_i) - P_i] c_i, \quad (6a)$$

$$\dot{s}_i = \lambda(\phi_i - s_i) - \rho_i(s_i)c_i, \quad (6b)$$

$$1 \leq i \leq N,$$

121 where  $\gamma_i$  ( $J^{-1}$ ) is the biomass yield, i.e. the amount of biomass that can be  
 122 built from each unit of energy. In addition,  $\lambda$  ( $s^{-1}$ ) is a flow rate and  $\phi_i$  ( $mol \cdot$   
 123  $cm^{-3}$ ) is the input concentration for the  $i$ -th substrate. In Fig. 1b we provide  
 124 typical values for several of the model constants. Unless otherwise specified,  
 125 these values are used in the simulations. In the Supplementary Information  
 126 (SI) we show the main properties of the dynamics generated by the above set  
 127 of differential equations. In particular, the stationary solutions correspond to

$$\gamma_i [E_i(s_i^*)\rho_i(s_i^*) - P_i] c_i^* = 0, \quad (7a)$$

$$\lambda(\phi_i - s_i^*) - \rho_i(s_i^*)c_i^* = 0, \quad (7b)$$

128 for all  $1 \leq i \leq N$ . The non trivial stationary solution ( $c_i^* > 0$ ) requires

$$E_i(s_i^*)\rho_i(s_i^*) = P_i. \quad (8)$$

129 This is a transcendental equation but one may find an explicit expression  
 130 for its solution in terms of the Lambert  $W$ -function<sup>2</sup> as (see SI for details)

---

<sup>2</sup>The Lambert  $W$ -function is the inverse function of  $f(z) = ze^z$ .

$$s_i^* = \frac{\frac{kP_i}{r_iRT}}{W\left(\frac{kP_i}{r_iRT} e^{\frac{r_iE^0\mathcal{E}_i - P_i}{r_iRT}}\right)}. \quad (9)$$

131 The corresponding asymptotic value for the concentration of the  $i$ -th con-  
132 sumer is then

$$c_i^* = \lambda \frac{\phi_i - s_i^*}{\rho_i(s_i^*)} = \frac{\lambda}{P_i} E_{eq}^i \left[ \phi_i - e^{\frac{E_{eq}^i - E^0\mathcal{E}_i}{RT}} \right], \quad (10)$$

133 where

$$E_{eq}^i = E_i(s_i^*) = E^0\mathcal{E}_i + RT \ln s_i^*, \quad (11)$$

134 is the asymptotic value for the reaction energy corresponding to the  $i$ -th  
135 substrate. It can be shown that if  $s_i^* < \phi_i$ , for every  $1 \leq i \leq N$ , every solution  
136 to the above system with  $c_i(0) > 0$  and  $s_i(0) > 0$ , for all  $1 \leq i \leq N$ , verifies  
137 that  $\lim_{t \rightarrow \infty} c_i(t) = c_i^*$  and  $\lim_{t \rightarrow \infty} s_i(t) = s_i^*$ , for all  $1 \leq i \leq N$  (for the formal  
138 proofs, see SI).

## 139 Diversity

140 Species richness is defined as the total number of species present in an ecosystem.  
141 Species evenness, on the other hand, refers to the shape of the distribution of  
142 relative abundances of the different species. The biological diversity, i.e. the  
143  $\alpha$ -diversity, depends on both. Similarly, one can extend the concepts of richness,  
144 evenness and  $\alpha$ -diversity to taxonomic groups, genes and functional groups of  
145 organisms. Here, biological  $\alpha$ -diversity is defined according to the Shannon



146 index:

$$H_B = - \sum_{i=1}^N b_i \ln b_i , \quad (12a)$$

$$b_i = \frac{c_i^*}{\sum_{j=1}^N c_j^*} . \quad (12b)$$

147 The instantaneous power supply for the  $i$ -th consumer is defined as

$$P_s^i(t) = \lambda \phi_i [E^0 \mathcal{E}_i + RT \ln s_i(t)] , \quad (13)$$

148 so that

$$\lim_{t \rightarrow \infty} P_s^i(t) = \lambda E_{eq}^i \phi_i =: P_s^i . \quad (14)$$

149 The power supply diversity is given by

$$H_P = - \sum_{i=1}^N p_i \ln p_i , \quad (15a)$$

$$p_i = \frac{P_s^i}{\sum_{j=1}^N P_s^j} . \quad (15b)$$

## 150 Variability of $H_P$ and $H_B$ across a chemical gradient

151 The Gibbs energy of a reaction is dependent on the activities (the product of  
 152 activity coefficient and concentration) of reactants and products as in equation  
 153 (2). Hence, even if the concentrations of reactants and products are kept con-  
 154 stant, the Gibbs energy of a reaction might change due to changes in activity  
 155 coefficients, which are dependent on environmental factors such as salinity. If  
 156 we know how concentrations and activities vary along a physicochemical gradi-  
 157 ent, we can use equation (2) to model Gibbs energies along that gradient. We

consider here the ideal case where the concentration of one compound, acting as a substrate or product in all oxidation reactions of  $s_i$ , is fixed at different values across a series of independent systems. The activity coefficient of this compound is kept constant so that only variability in concentration causes variability in activity. As an example, we take such a compound to be  $H^+$ . We assume the fluxes of limiting substrates to be the same for all systems. Hence, we investigate how biological diversity varies along a pH gradient. Given a substrate concentration  $s_i$ , the reaction energy is thus given by

$$\hat{E}_i(s_i) = E^0 \mathcal{E}_i + RT \ln s_i + \kappa_i n_i RT pH \ln 10, \quad (16)$$

where  $n_i$  is the proton stoichiometry coefficient for the reaction of the  $i$ -th substrate and  $\kappa_i$  is either +1, if  $H^+$  is a product, or -1 if it is a reactant. The stationary solutions now depend explicitly on the  $pH$ , which entails the  $pH$ -dependence of both the biological and power supply diversities (see SI)

$$H_B(pH) = - \sum_i \hat{b}_i(pH) \ln \left( \hat{b}_i(pH) \right), \quad (17a)$$

$$H_P(pH) = - \sum_i \hat{P}_s^i(pH) \ln \left( \hat{P}_s^i(pH) \right), \quad (17b)$$

$$\text{with } \hat{b}_i(pH) = \frac{c_i^*(pH)}{\sum_j c_j^*(pH)} \text{ and } \hat{P}_s^i(pH) = \frac{\phi_i \hat{E}_{eq}^i(pH)}{\sum_j \phi_j \hat{E}_{eq}^j(pH)}.$$

## RESULTS

At population equilibrium, for any given species  $i$ , the power supply to the system ( $P_s^i$ ) is determined by the flowrate ( $\lambda$ ), the initial substrate concentration ( $\phi_i$ ) and the reaction energy ( $E_{eq}^i$ ) (equation (14)) whereas, in terms of the power supply ( $P_s^i$ ), the abundance of cells for the  $i$ -th species ( $c_i^*$ ) is expressed as

$$c_i^* = \frac{P_s^i}{P_i} \left[ 1 - \frac{1}{\phi_i} e^{\frac{E_{eq}^i - E^0 \epsilon_i}{RT}} \right]. \quad (18)$$

Thus, the power supply does not determine uniquely the species abundance. In order to explore the relationship between the diversity of power supply and biological diversity, we applied equations (12a) and (15a) to several combinations of  $\phi_i$ ,  $\lambda$ , and  $G_{eq}^i$  (Fig. S2).

## Relationships between biological diversity and parameters determining power supply

In this section we consider the dependence of the biological diversity on the number of consumers and on the energy they are able to extract. The number of consumers will be taken to vary on the range 10 – 1000. The variability in  $E_i^0$ , will be modelled by varying  $E^0$  on the range  $10^3 - 10^5 J \cdot mol^{-1}$ . In addition, we will simulate several biologically relevant scenarios in terms of the availability of substrates and the efficiency of the consumers, as explained in the following.

*Case 1: Identical power supply for all species.* For reference, we first consider the trivial case where all consumers have identical traits (except for substrate specificity), and where there is no variability in input concentrations of substrates ( $\phi_i$ ) or in the molar energy available from substrate oxidation ( $\epsilon_i = 1$  for all  $i$ ). Clearly, in this situation all equilibrium values will be identical, in particular given by

$$s_i^* = s^*(E^0) = \frac{\frac{kP_0}{r_{max}RT}}{W\left(\frac{kP_0}{r_{max}RT} e^{\frac{r_{max}E^0 - P_0}{r_{max}RT}}\right)}, \quad (19a)$$

$$c_i^* = c^* = \frac{\lambda}{P_0} E_{eq} \left[ \phi_0 - e^{\frac{E_{eq} - E^0}{RT}} \right], \quad (19b)$$

$$E_{eq} = E^0 + RT \ln s^*(E_0), \quad (19c)$$

$$\phi_0 = 1.2 \max_{E^0} \{s^*(E^0)\}, \quad (19d)$$

where  $\max_{E^0} \{\}$  denotes the maximum over the range of values considered for  $E^0$ . Therefore, the biological diversity (equation(12a)) will be just  $H_B = \ln N$  ( $N$  being the number of consumers) and hence independent of  $E^0$  (Fig. S3).

*Case 2: Effect of variation in input concentration*. In order to investigate what effect variation of input concentrations ( $\phi_i$ ) has on the biological diversity, we adjust the model from case 1 so that  $\phi_i$  depends on the substrate-consumer pair as (Fig. S2a):

$$\phi_i = \left( 10^3 e^{-\frac{(i-n/2)^2}{n}} + 1.2 \right) \phi_0, \quad \phi_0 = \max_{E^0} \{s^*(E^0)\}, \quad (20)$$

where  $n$  denotes the number of consumers. Due to the symmetry of these distributions around  $n/2$ , the relative abundances of consumers satisfy the constraint  $b_i = b_{n-i}$ . Since the asymptotic value for the concentration of substrates ( $s_i^*$ ) is independent of  $\phi_i$ ,  $s_i^*$  will in this case be the same for all  $i$  ( $s_i^* = s^*(E^0)$ ) while the asymptotic values of the concentrations of consumers will in general differ as

$$c_i^*(E^0) = \frac{\lambda}{P_0} E_{eq} [\phi_i - s^*(E_0)] , \quad (21a)$$

$$E_{eq} = E^0 + RT \ln s^*(E_0) . \quad (21b)$$

207 This is reflected in the decrease of the biological diversity magnitude with  
208 respect to the maximum value  $\ln N$  ( $N$  being the number of consumers) (Fig.  
209 2a). Notice that the relative abundance of each consumer is nearly independent  
210 of  $E^0$  (Fig. 3a). This can be understood as follows: From equations (22), the  
211 relative abundance for the  $i$ -th consumer is given by

$$\frac{c_i^*}{\sum_j c_j^*} = \frac{10^3 \phi_0 e^{-\frac{(i-n/2)^2}{n}} + 1.2 \phi_0 - s^*(E^0)}{10^3 \phi_0 \sum_{j=1}^n e^{-\frac{(j-n/2)^2}{n}} + n(1.2 \phi_0 - s^*(E^0))} . \quad (22)$$

212 Therefore, for most of the values of  $E^0$  the dominant term in equation (22)  
213 will be  $10^3 \phi_0 e^{-\frac{(i-n/2)^2}{n}} + 1.2 \phi_0$  and hence the relative abundance will be nearly  
214  $E^0$ -independent. Only for low values of  $E^0$  is the term  $s^*(E^0)$  relevant. From  
215 equation (22) it is also clear that the most abundant consumers correspond to  
216 those having the highest supply of substrates i.e. highest  $\phi_i$  (Fig. 3a). The  
217 dependence of  $E_{eq}^i$  on  $E^0$  is shown in Fig. S4.

218 *Case 3: Effect of variation in the energy scale across consumers.* In order to  
219 investigate what effect variation in the energy level of substrate oxidation across  
220 consumers has on the biological diversity, we adjusted the model from case 1 so  
221 that  $E^0$  depends on the substrate-consumer pair as (Fig. S2b)

$$E_i^0 = E^0 \mathcal{E}_i , \quad \mathcal{E}_i = e^{-\frac{(i-n/2)^2}{5n}} + 1/6 , \quad (23)$$

222 while

$$\phi_i = \phi_0 = 1.2 \max_{E^0, i} \{s_i^*(E^0)\}, \quad (24a)$$

$$s_i^*(E^0) = \frac{\frac{kP_0}{r_{max}RT}}{W\left(\frac{kP_0}{r_{max}RT} e^{\frac{r_{max}E^0\mathcal{E}_i - P_0}{r_{max}RT}}\right)}, \quad (24b)$$

$$c_i^*(E^0) = \frac{\lambda}{P_0} E_{eq}^i \left[ \phi_0 - e^{\frac{E_{eq}^i - E^0\mathcal{E}_i}{RT}} \right], \quad (24c)$$

$$E_{eq}^i = E^0\mathcal{E}_i + RT \ln s_i^*(E^0). \quad (24d)$$

Where  $\max_{E^0, i} \{ \}$  denotes the maximum value over the range of values for  $E^0$  and over the consumers. As expected, a gradient in the substrate reaction energy increases the sensitivity of the biological diversity on the energy scale  $E^0$  (Fig. 2b), where a clear increase of the diversity occurs for low energy scales. The relative abundance of consumers now depends on  $E^0$  in a non-trivial way (Fig. 3b). Notice that around  $E^0 \lesssim 3 \times 10^4 J \cdot mol^{-1}$  all consumers have almost the same abundance (and hence it corresponds to the maximum value of the biological diversity in Fig. 2b). Even though the  $E^0$ -dependence of the relative abundance is non-trivial, it still holds, as expected, that the most abundant consumers correspond to those with more availability of energy (Fig. 3b). The dependence of  $E_{eq}^i$  on  $E^0$  is also non-trivial in this scenario (Fig. S5).

*Case 4: Effect of trade-off between energy acquisition efficiency and maintenance power.* A biological trade-off between energy acquisition efficiency and maintenance power is arguably a key fitness trade-off in numerous habitats. For example, being motile by means of having flagella or having many highly efficient transporters will typically increase power demands (reducing the fitness), but at the same time increase the cellular power supply (increasing the fitness). Here, we model this trade-off by adjusting the case 1 model so that the distributions for the uptake rate ( $r_i$ ) and the maintenance power ( $P_i$ ) are given by

(Fig. S2c and S2d)

$$r_i = r_{max} \left( e^{-\frac{(i-n/2)^2}{n/2}} + \frac{1}{100} \right), \quad (25a)$$

$$P_i = P_0 \left( e^{-\frac{(i-n/2)^2}{n/2}} + \frac{1}{20} \right), \quad (25b)$$

while the remaining quantities are

$$\phi_i = \phi_0 = 1.2 \max_{E^0, i} \{s_i^*(E^0)\}, \quad (26a)$$

$$s_i^*(E^0) = \frac{\frac{kP_i}{r_i RT}}{W \left( \frac{kP_i}{r_i RT} e^{\frac{r_i E^0 - P_i}{r_i RT}} \right)}, \quad (26b)$$

$$c_i^*(E^0) = \frac{\lambda}{P_i} E_{eq}^i \left[ \phi_0 - e^{\frac{E_{eq}^i - E^0}{RT}} \right], \quad (26c)$$

$$E_{eq}^i = E^0 + RT \ln s_i^*(E_0). \quad (26d)$$

The biological diversity seems to be rather insensitive to the efficiency-cost trade-off (Fig. 2c) although the relative abundance shows a weak dependence on  $E^0$  (Fig. 3c). It is worth noting that the most abundant consumers correspond to those with low values of both uptake-rate and maintenance power (Fig. 3c), although there is little variation between species regarding the energy available from each mole of substrate ( $E_{eq}^i$ ) (Fig. S6).

*Case 5: Combined effect of biological trade-off, and variability in  $\phi_i$  and  $E_i^0$ .*

In order to investigate the combined affect of variations considered in cases 2-4, we modified the model from case 1 so that:

$$\phi_i = \left( 10^3 e^{-\frac{(i-n/2)^2}{n}} + 1.2 \right) \phi_0, \quad \mathcal{E}_i = e^{-\frac{(i-n/2)^2}{5n}} + \frac{1}{6}, \quad (27a)$$

$$r_i = r_{max} \left( e^{-\frac{(i-n/2)^2}{n/2}} + \frac{1}{100} \right), \quad P_i = P_0 \left( e^{-\frac{(i-n/2)^2}{n/2}} + \frac{1}{20} \right), \quad (27b)$$

$$s_i^*(E^0) = \frac{\frac{kP_i}{r_i RT}}{W \left( \frac{kP_i}{r_i RT} e^{\frac{r_i E^0 \mathcal{E}_i - P_i}{r_i RT}} \right)}, \quad \phi_0 = \max_{E^0, i} \{s_i^*\}, \quad (27c)$$

$$c_i^*(E^0) = \frac{\lambda}{P_i} E_{eq}^i \left[ \phi_0 - e^{\frac{E_{eq}^i - E^0 \mathcal{E}_i}{RT}} \right], \quad E_{eq}^i = E^0 \mathcal{E}_i + RT \ln s_i^*(E_0). \quad (27d)$$

253 In this case, the biological diversity acquires a non-trivial  $E^0$ -dependence  
 254 with a clear increase towards low values of  $E^0$  (Fig. 2d). The relative abundance  
 255 of consumers depends on  $E^0$  in a highly complex way (Fig. 3d). Remarkably,  
 256 the particular identity of the most abundant consumer is  $E^0$ -dependent (Fig.  
 257 3d). For instance, for an energy scale of  $E^0 \sim 4 \times 10^4 J \cdot mol^{-1}$ , the most  
 258 abundant consumer is the one with the highest uptake rate ( $i = 25$ ), whereas  
 259 for lower energy scales ( $E^0 \lesssim 2 \times 10^4 J \cdot mol^{-1}$ ) the relative abundance of  
 260 the same consumer drops from  $\sim 0.05$  to  $\sim 0.01$ , making it one of the least  
 261 abundant consumers (Fig. 3d). The complex dependence of  $E_{eq}^i$  on  $E^0$  (Fig.  
 262 S7) renders all values for  $E_{eq}^i$  comparatively small on the range  $E^0 \sim 2 - 4 \times$   
 263  $10^4 J \cdot mol^{-1}$ , while the energy availability is more markedly different across  
 264 consumers for  $E^0 \gtrsim 4 \times 10^4 J \cdot mol^{-1}$ , the species with the highest uptake rate  
 265 ( $i = 25$ ) being the most energetically advantaged. For  $E^0 \lesssim 2 \times 10^4 J \cdot$   
 266 however, the  $i = 25$  consumer is one of the least energetically advantaged (Fig.  
 267 S7). The energetic disadvantage of the  $i = 25$  consumer for  $E^0 \lesssim 2 \times 10^4 J \cdot$   
 268  $mol^{-1}$  is clearly reflected in its low relative abundance over these energy scales  
 269 (Fig. 3d). Interestingly, for  $E^0 \gtrsim 5 \times 10^4 J \cdot mol^{-1}$ , the  $i = 25$  consumer  
 270 is not the most abundant even though it is the most energetically advantaged  
 271 (i.e it has the highest  $\phi_i$  and  $\mathcal{E}_i$  values). This asymmetric behavior across



energy scales clearly emerges from the combined effect of all the above model scenarios. At a high energy scale, the percentage difference between the most energetically advantaged consumers and those with baseline values for  $E_{eq}^i$ , is relatively small and of little relevance. Therefore the effect of the efficiency-cost trade-off becomes more significant. This explains why, for high energy scales, the most abundant consumers correspond to those with moderate values for both  $r_i$  and  $P_i$  (Fig. 3d).

## Relationship between biological and power supply diversities.

Here we determine how the relationship between biological diversity ( $H_B$ ) and power supply diversity ( $H_P$ , equations (15)) is affected by distributions of  $\phi_i$ ,  $E_i^0$ , and a biological trade-off between energy acquisition efficiency and power demands. We will consider the same distributions and combinations as above (cases 2-5).

*Case 2: Effect of variability in  $\phi_i$ .* We find that the relation between the biological diversity ( $H_B$ ) and the power supply diversity ( $H_P$ ) is nearly linear (because  $H_P \simeq H_B$ ) across all energy scales and number of consumers considered (Fig. 4a and Fig. S8).

*Case 3: Effect of variability in  $E_i^0$ .* Considering instead distributions for  $E_i^0$  as in equation (23), we find no significant deviation from the linearity relationship  $H_P/H_B \simeq 1$  over all energy scales ( $E^0$ ) and number of consumers ( $N$ ) considered (Fig. 4b and Fig. S9).

*Case 4: Effect of trade-off between energy acquisition efficiency and maintenance power.* Adding a trade-off between the energy acquisition efficiency and the maintenance power increases the complexity in the relationship between  $H_B$  and  $H_P$ , especially for low values of the number of consumers (Fig. 4c). This

implies that the relationship between  $H_P$  and  $H_B$  might deviate from linearity (Fig. S10). The ratio  $H_P/H_B$  is rather insensitive to the energy scale  $E^0$ .

*Case 5: Combined effect of biological trade-off, and variability in  $\phi_i$  and  $E_i^0$ .*

Similarly to the case 5 above, when all the above distributions are considered simultaneously, the complexity of the relation between the biological diversity and the power supply diversity increases significantly (Fig. 4d and Fig. S11). It is worth noting that each of the above considered scenarios by itself renders the power diversity always greater than the biological diversity ( $H_P/H_B \geq 1$ ). However, when all these scenarios are considered simultaneously, the biological diversity can become significantly greater than the power diversity (Fig. 4).

## Global scaling of the power supply

Increasing the overall power supply ( $\sum_i \lambda \phi_i E_{eq}^i$ ) by increasing the flow of fluids into the system (i.e. increasing  $\lambda$ ), has no effect on  $H_B$ . This is evident, as  $\lambda$  factors out in the calculation of the relative abundance of a species (equation (12b)). However, changing the concentration of all substrates in the fluids entering the system has an effect on  $H_B$ , even when the diversity of power supply  $H_P$  remains unaffected. To see this, we analysed the response of the biological diversity to a global scaling of the power supply, i.e.  $P_s^i \rightarrow \Lambda P_s^i$ , Fig. 5. In particular, under a global rescaling of the initial concentration of substrate as  $\phi_i(\Lambda) = \Lambda \phi_i$  (the Gibbs energy at equilibrium population is unaffected by such a scaling), the relative abundance of specialists (equation (12b)) is modified to

$$b_i(\Lambda) = \frac{A_i - B_i/\Lambda}{A - B/\Lambda} \quad (28)$$

where  $A_i = \frac{E_{eq}^i \phi_i}{P_i}$ ,  $B_i = \frac{E_{eq}^i}{P_i} s_i^*$ ,  $A = \sum_i A_i$  and  $B = \sum_i B_i$ . Therefore,

for high enough values of the scaling factor it holds that  $H_B(\Lambda)$  saturates to  $\ln(A) - \frac{1}{A} \sum_i A_i \ln(A_i)$  (Fig. 5). This demonstrates that changing the total power supply to the system, may or may not affect  $H_B$ , depending on the exact setting of the system and whether the change in power supply is a result of changes in fluid flow or a scaling of the concentration of substrates entering the system.

## Biological diversity dependence on pH

How the biological diversity changes with pH is, within our modelling framework, largely dependent on the exact chemical and biological setting of the system. For example, in a system with only two biological species where  $H^+$  is produced by one organism and consumed by the other, a decrease in pH (i.e. increase in  $H^+$ ) causes an increase of the power supply to the consumer of  $H^+$  whereas it makes the power supply to the producer decrease. This is easily checked using equation (16), from which we readily see that  $\frac{\partial E_i}{\partial pH} < 0$  for the consumer while  $\frac{\partial E_i}{\partial pH} > 0$  for the producer. Depending on the particular values of  $\Delta G^0$  for the chemical reactions used by the two biological species, the available energies at population equilibrium ( $E_{eq}^i$ ) may diverge from each other (Fig. S12a) or converge to each other and cross (Fig. 6c). This reflects on the corresponding stationary concentrations of both species (Fig. 6a). The effect on the biological diversity is either a monotonic decrease (Fig. S13b) or the presence of a global maximum (Fig. 6b). In a system with many biological species, such connections may become highly complex (Fig. 6e - 6h). In particular, even when the shape of the power supply diversity is essentially the same as that for very few species (Fig. 6h and 6d), the corresponding biological diversity displays a highly complex dependence on the pH (Fig. 6f). These analyses demonstrate how  $H_B$  can vary along a pH gradient, due to a ther-

modynamic dependency between pH and power supply. Within our modelling framework, the connections between pH and diversity will be similar between systems hosting the same biological species, but can be very different between systems hosting different biological species.

## DISCUSSION

This study provides a comprehensive theoretical analysis of the coupling between fluxes of chemical energy and  $\alpha$ -diversity. We consider a population dynamic model where growth is energy limited, which arguably is the case for most of Earth's biosphere [33]. Our model is derived from a few fundamental principles relating chemical power supply to a system, cellular rates of substrate uptake, cellular power demands, and population size. The model assumes that biological species grow independently of each other on one limiting substrate each, hence the species richness is trivially equal to the number of limiting substrates. However, by shaping the relative abundance of species, fluxes of energy influence the biodiversity in non-intuitive ways.

The model parameters have a clear relevance to real ecosystems. For example,  $\lambda$  may describe the flow rate of substrates into and out of a fermentor or river discharge into and out of a lake; values of  $\phi_i$  describe concentrations of substrate in the inflow;  $E^0$  levels describe typical energy availability per mole of substrate oxidation under given environmental conditions, and  $E_i^0$  values describe cell-specific energy availability per mole of substrate. This study demonstrates that even within a simple and highly idealised model framework, complex relationships emerge between the energetic setting of a system and its biodiversity where distributions of  $\phi_i$  and  $E_i^0$ , as well as  $E^0$  levels, contribute to shaping biodiversity in distinct ways. Adding a biological trade-off between energy acquisition efficiency and maintenance power increases this complexity

374 even further.

375 Our numerical experiments demonstrate that a global scaling of  $E^0$  is suffi-  
 376 cient to create changes in diversity patterns. Interestingly,  $E^0$  levels also seem  
 377 to have a large impact on the identity of dominant species in models where both  
 378  $E_i^0$  and  $\phi_i$  values vary and a trade-off between  $P_i$  and  $r_i$  is considered (Fig. 3d).  
 379 Although values of  $E^0$  will rarely change with a common factor for all energy  
 380 yielding reactions along a chemical gradient, the energy scale  $E^0$  is a potentially  
 381 important parameter for understanding how environmental conditions shape the  
 382 overall distribution of microbial species. Changing the power supply to a system  
 383 by a scaling of  $\lambda$  has a fundamentally different effect on  $H_B$  than if the same  
 384 increase in power supply occurs due to a global scaling of  $\phi_i$  values – i.e. within  
 385 our modelling framework,  $H_B$  remains unaffected by a scaling of  $\lambda$  but responds  
 386 to a scaling of  $\phi_i$  values, particularly for low  $E^0$  values Fig. 5. This finding has  
 387 a clear relevance to natural systems. For example, if we want to predict the  
 388 microbial diversity in an ecosystem, then the concentration of substrates in flu-  
 389 ids flowing into the system may be a stronger predictor than the rate of fluid  
 390 inflow. Note that variability in  $\phi_i$  does not affect the chemical composition of  
 391 the system (except for species abundance). Consequently, environments with  
 392 identical *in situ* environmental conditions may still host microbial communities  
 393 with different  $H_B$  due to differences in the mode of power supply.

394 Despite the emergent complexity of the connections between energy supply  
 395 and diversity, our results suggest that the diversity of power supply ( $H_P$ ) may  
 396 be an overall good predictor for biological diversity ( $H_B$ ), at least across envi-  
 397 ronments with similarly shaped distributions of  $\phi_i$  and  $E_i^0$  values (Fig. S8-S11).  
 398 Whether or not such connections hold when more complex food webs and species  
 399 interactions are considered, is clearly a topic for future research. We stress, how-  
 400 ever, that a strong correlation between  $H_P$  and  $H_B$  does not imply that chemical

401 gradients shape biodiversity patterns in a simple way. Rather, as exemplified  
 402 by our analysis of biodiversity along a pH gradient (Fig. 6), variations in the  
 403 activity of a single chemical compound may have very different effects on  $H_P$   
 404 and  $H_B$  under different chemical and biological settings. Such heterogeneity  
 405 in the relationship between pH and microbial  $\alpha$ -diversity has been observed in  
 406 different environments. In a study of 431 geographically widespread and envi-  
 407 ronmentally disparate lakes, no correlation was found between  $\alpha$ -diversity and  
 408 pH [34]. In contrast, pH has been found to be a major driver of soil communi-  
 409 ties and is often reported to be one of the strongest predictors of  $\alpha$ -diversity [1,  
 410 35]. Reported trends in the relationship between pH and microbial  $\alpha$ -diversity  
 411 in soil also differ. In an analysis of 300 grassland and forest soils in Germany,  
 412  $\alpha$ -diversity increased with pH from pH 3 to pH 7.5, but with a plateau around  
 413 pH 5 – 6 [1]. In analyses of numerous types of US soil samples, covering a pH  
 414 range of 3-9, the  $\alpha$ -diversity peaked at pH around 6-7. The diversity patterns  
 415 observed in soils globally seem to emerge from an aggregation of multiple simpler  
 416 relationships between pH and the relative abundance of individual taxonomic  
 417 groups from phylum to species level [1, 36–38]. Intriguingly, this emergence of  
 418 complexity from simple pH dependence of species abundance is what we find in  
 419 our model (Fig. 6e,f).

420 Based on our modelling results, we propose three expectations that can act  
 421 as working hypotheses for further inquiry:

- 422 •  $E^0$  levels and the shape of the distributions of  $\phi_i$  and  $E_i^0$  influence mi-  
 423 crobial biodiversity in different ways.  $H_B$  is more sensitive to variation in  
 424 the  $E_i^0$  distribution than to comparable variation in the distribution of  $\phi_i$   
 425 values.
- 426 •  $H_P$  is a useful predictor for  $H_B$  across environments with similar  $E^0$  levels  
 427 and similarly shaped distributions of  $\phi_i$  and  $E_i^0$ .

- There is no general trend between a given chemical gradient and biodiversity, rather the relationship between them depends on the thermodynamic setting of the environment.

These expectations can be tested directly under chemostat conditions where chemical fluxes and the chemical composition of the system can be controlled, and microbial communities can be easily monitored – e.g. through 16S rRNA gene sequence analyses. In order to set up an experimental system comparable to what is modelled here, the species grown in the chemostat should have distinct substrate spectra so that each species acquires energy by the oxidation of one limiting substrate each. In principle, one could analyse diversity patterns in a system with only two species, but a higher number of species may be desirable for a more robust analysis. Estimates of maintenance power can be obtained experimentally, taking into account that maintenance power depends on environmental conditions, such as temperature [33, 39, 40].

In the field of microbial ecology, connections between environmental setting and biodiversity in natural systems have thus far mostly been explored through linear regression analyses or multivariate analyses involving directly measurable environmental parameters. Our results suggest that in order to identify driving mechanisms of biodiversity and community structure, a concerted effort should be put into assessing the role of power supply. Quantifying chemical power supply in natural environments can be challenging as it requires accurate information on chemical composition and dominant chemical fluxes in the system. Another complicating factor is that variations in the concentration of a chemical compound may have both direct and indirect effects on energy fluxes. For example, pH influences energy availability directly in energy yielding reactions where protons act as reactants or products, but also indirectly by modulating the activity coefficient or chemical speciation of numerous chemical compounds [24].

Hence, there is a need to develop improved methods for estimating energy fluxes and including such estimates in ecological studies to test model predictions.

In summary, our findings highlight the importance of taking into account energy supply and energy utilization in microbial systems in order to advance our understanding of how the fundamental laws of thermodynamics shape the biosphere.

## References

1. Kaiser, K. *et al.* Driving forces of soil bacterial community structure, diversity, and function in temperate grasslands and forests. *Scientific Reports* **6**. ISSN: 2045-2322 (SEP 21 2016).
2. Zhao, S. *et al.* Soil pH is equally important as salinity in shaping bacterial communities in saline soils under halophytic vegetation. *Scientific Reports* **8**. ISSN: 2045-2322 (MAR 14 2018).
3. Pommier, T. *et al.* Global patterns of diversity and community structure in marine bacterioplankton. *Molecular Ecology* **16**, 867–880. ISSN: 0962-1083 (FEB 2007).
4. Fuhrman, J. A. Microbial community structure and its functional implications. *Nature* **459**, 193–199. ISSN: 0028-0836 (MAY 14 2009).
5. Yang, J., Ma, L., Jiang, H., Wu, G. & Dong, H. Salinity shapes microbial diversity and community structure in surface sediments of the Qinghai-Tibetan Lakes. *Scientific Reports* **6**. ISSN: 2045-2322 (APR 26 2016).
6. Zhang, K. *et al.* Salinity Is a Key Determinant for Soil Microbial Communities in a Desert Ecosystem. *mSystems* **4**. ISSN: 2379-5077 (JAN-FEB 2019).



- 479 7. Vidal-Dura, A., Burke, I. T., Mortimer, R. J. G. & Stewart, D. I. Diversity  
480 patterns of benthic bacterial communities along the salinity continuum of  
481 the Humber estuary (UK). *Aquatic Microbial Ecology* **81**, 277–291. ISSN:  
482 0948-3055 (2018).
- 483 8. Osterholz, H., Kirchman, D. L., Niggemann, J. & Dittmar, T. Diversity of  
484 bacterial communities and dissolved organic matter in a temperate estuary.  
485 *FEMS Microbiology Ecology* **94**. ISSN: 0168-6496 (AUG 2018).
- 486 9. Antwis, R. E. *et al.* Fifty important research questions in microbial ecology.  
487 *FEMS Microbiology Ecology* **93**. ISSN: 0168-6496 (MAY 2017).
- 488 10. Grosskopf, T. & Soyer, O. S. Synthetic microbial communities. *Current*  
489 *Opinion in Microbiology* **18**, 72–77. ISSN: 1369-5274 (2014).
- 490 11. Grosskopf, T. & Soyer, O. S. Microbial diversity arising from thermody-  
491 namic constraints. English. *ISME Journal* **10**, 2725–2733. ISSN: 1751-7362  
492 (NOV 2016).
- 493 12. Gudelj, I. *et al.* An integrative approach to understanding microbial di-  
494 versity: from intracellular mechanisms to community structure. *Ecology*  
495 *Letters* **13**, 1073–1084. ISSN: 1461-023X (SEP 2010).
- 496 13. O'Brien, S., Hodgson, D. J. & Buckling, A. The interplay between mi-  
497 croevolution and community structure in microbial populations. *Current*  
498 *Opinion in Biotechnology* **24**, 821–825. ISSN: 0958-1669 (AUG 2013).
- 499 14. Hsu, S.-B., Hubbell, S. & Waltman, P. A mathematical theory for single-  
500 nutrient competition in continuous cultures of micro-organisms. *SIAM*  
501 *Journal on Applied Mathematics* **32**, 366–383 (1977).
- 502 15. Hsu, S. Limiting behavior for competing species. *SIAM Journal on Applied*  
503 *Mathematics* **34**, 760–763 (1978).

- 504 16. Butler, G. & Wolkowicz, G. A mathematical model of the chemostat with  
505 a general class of functions describing nutrient uptake. *SIAM Journal on*  
506 *Applied Mathematics* **45**, 138–151 (1985).
- 507 17. Wolkowicz, G. S. & Lu, Z. Global dynamics of a mathematical model of  
508 competition in the chemostat: general response functions and differential  
509 death rates. *SIAM Journal on Applied Mathematics* **52**, 222–233 (1992).
- 510 18. Winter, C., Bouvier, T., Weinbauer, M. G. & Thingstad, T. F. Trade-Offs  
511 between Competition and Defense Specialists among Unicellular Plank-  
512 tonic Organisms: the “Killing the Winner” Hypothesis Revisited. *Micro-*  
513 *biology and Molecular Biology Reviews* **74**, 42–57. ISSN: 1092-2172 (MAR  
514 2010).
- 515 19. Thingstad, T. Elements of a theory for the mechanisms controlling abun-  
516 dance, diversity, and biogeochemical role of lytic bacterial viruses in aquatic  
517 systems. *Limnology and Oceanography* **45**, 1320–1328. ISSN: 0024-3590  
518 (SEP 2000).
- 519 20. Louca, S. *et al.* Integrating biogeochemistry with multiomic sequence in-  
520 formation in a model oxygen minimum zone. *Proceedings of the National*  
521 *Academy of Sciences of the United States of America* **113**, E5925–E5933.  
522 ISSN: 0027-8424 (OCT 4 2016).
- 523 21. Reed, D. C., Algar, C. K., Huber, J. A. & Dick, G. J. Gene-centric ap-  
524 proach to integrating environmental genomics and biogeochemical models.  
525 *Proceedings of the National Academy of Sciences of the United States of*  
526 *America* **111**, 1879–1884. ISSN: 0027-8424 (FEB 4 2014).
- 527 22. Dahle, H., Okland, I., Thorseth, I. H., Pedersen, R. B. & Steen, I. H.  
528 Energy landscapes shape microbial communities in hydrothermal systems  
529 on the Arctic Mid-Ocean Ridge. *ISME Journal* **9**, 1593–1606. ISSN: 1751-  
530 7362 (JUL 2015).

- 531 23. Dahle, H. *et al.* Energy Landscapes in Hydrothermal Chimneys Shape Dis-  
532 tributions of Primary Producers. *Frontiers in Microbiology* **9**. ISSN: 1664-  
533 302X (JUL 16 2018).
- 534 24. Jin, Q. & Kirk, M. F. pH as a Primary Control in Environmental Microbi-  
535 ology: 1. Thermodynamic Perspective. *Frontiers in Environmental Science*  
536 **6**. ISSN: 2296-665X (MAY 1 2018).
- 537 25. Larowe, D. E. & Amend, J. P. Catabolic rates, population sizes and dou-  
538 bling/replacement times of microorganisms in natural settings. *American*  
539 *Journal of Science* **315**, 167–203. ISSN: 0002-9599 (MAR 2015).
- 540 26. Dick, J. M. CHNOSZ: Thermodynamic calculations and diagrams for geo-  
541 chemistry. *Frontiers in Earth Science* **7**, 180 (2019).
- 542 27. Pirt, S. J. The maintenance energy of bacteria in growing cultures. *Proc.*  
543 *R. Soc. Lond., B, Biol. Sci.* **163**, 224–231 (Oct. 1965).
- 544 28. Hoehler, T. M. & Jorgensen, B. B. Microbial life under extreme energy  
545 limitation. *Nat. Rev. Microbiol.* **11**, 83–94 (Feb. 2013).
- 546 29. Van Bodegom, P. Microbial maintenance: a critical review on its quantifi-  
547 cation. *Microb. Ecol.* **53**, 513–523 (May 2007).
- 548 30. Neijssel, O. M. & Tempest, D. W. The role of energy-spilling reactions in  
549 the growth of *Klebsiella aerogenes* NCTC 418 in aerobic chemostat culture.  
550 *Arch. Microbiol.* **110**, 305–311 (Nov. 1976).
- 551 31. Cook, G. M. & Russell, J. B. Energy-spilling reactions of *Streptococcus bo-*  
552 *vis* and resistance of its membrane to proton conductance. *Appl. Environ.*  
553 *Microbiol.* **60**, 1942–1948 (June 1994).
- 554 32. Russell, J. B. & Strobel, H. J. ATPase-dependent energy spilling by the  
555 ruminal bacterium, *Streptococcus bovis*. *Arch. Microbiol.* **153**, 378–383  
556 (1990).

- 557 33. Hoehler, T. M. Biological energy requirements as quantitative boundary  
558 conditions for life in the subsurface. *Geobiology* **2**, 205–215. ISSN: 1472-4677  
559 (OCT 2004).
- 560 34. Yang, J., Jiang, H., Dong, H. & Liu, Y. A comprehensive census of lake  
561 microbial diversity on a global scale. *Science China-Life Sciences* **62**, 1320–  
562 1331. ISSN: 1674-7305 (OCT 2019).
- 563 35. Fierer, N. & Jackson, R. The diversity and biogeography of soil bacte-  
564 rial communities. *Proceedings of the National Academy of Sciences of the*  
565 *United States of America* **103**, 626–631. ISSN: 0027-8424 (JAN 17 2006).
- 566 36. Nacke, H. *et al.* Pyrosequencing-Based Assessment of Bacterial Commu-  
567 nity Structure Along Different Management Types in German Forest and  
568 Grassland Soils. *PLOS ONE* **6**. ISSN: 1932-6203 (FEB 16 2011).
- 569 37. Will, C. *et al.* Horizon-Specific Bacterial Community Composition of Ger-  
570 man Grassland Soils, as Revealed by Pyrosequencing-Based Analysis of  
571 16S rRNA Genes. *Applied and Environmental Microbiology* **76**, 6751–6759.  
572 ISSN: 0099-2240 (OCT 2010).
- 573 38. Lauber, C. L., Hamady, M., Knight, R. & Fierer, N. Pyrosequencing-Based  
574 Assessment of Soil pH as a Predictor of Soil Bacterial Community Struc-  
575 ture at the Continental Scale. *Applied and Environmental Microbiology* **75**,  
576 5111–5120. ISSN: 0099-2240 (AUG 1 2009).
- 577 39. Tijhuis, L., Van Loosdrecht, M. C. M. & Heijnen, J. J. A thermodynami-  
578 cally based correlation for maintenance gibbs energy requirements in aere-  
579 bic and anaerobic chemotrophic growth. *Biotechnology and Bioengineering*  
580 **42**, 509–519. eprint: [https://onlinelibrary.wiley.com/doi/pdf/10.](https://onlinelibrary.wiley.com/doi/pdf/10.1002/bit.260420415)  
581 [1002/bit.260420415](https://onlinelibrary.wiley.com/doi/pdf/10.1002/bit.260420415). [https://onlinelibrary.wiley.com/doi/abs/](https://onlinelibrary.wiley.com/doi/abs/10.1002/bit.260420415)  
582 [10.1002/bit.260420415](https://onlinelibrary.wiley.com/doi/abs/10.1002/bit.260420415) (1993).

- 583 40. Price, P. & Sowers, T. Temperature dependence of metabolic rates for  
584 microbial growth, maintenance, and survival. *Proceedings of the National*  
585 *Academy of Sciences of the United States of America* **101**, 4631–4636. ISSN:  
586 0027-8424 (MAR 30 2004).

## 587 **Acknowledgements**

588 This work was supported by the K.G. Jebsen Center for Deep Sea Research and  
589 by a Trond Mohn Foundation Starting Grant to B.H.

## 590 **Competing interests**

591 The authors declare no competing interests.

## 592 FIGURES

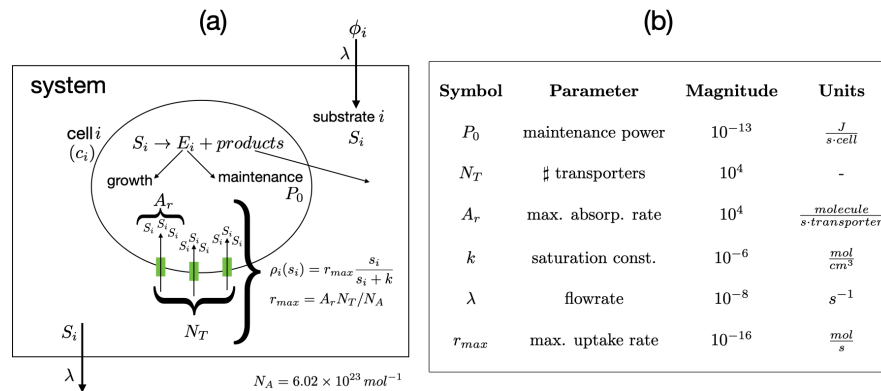

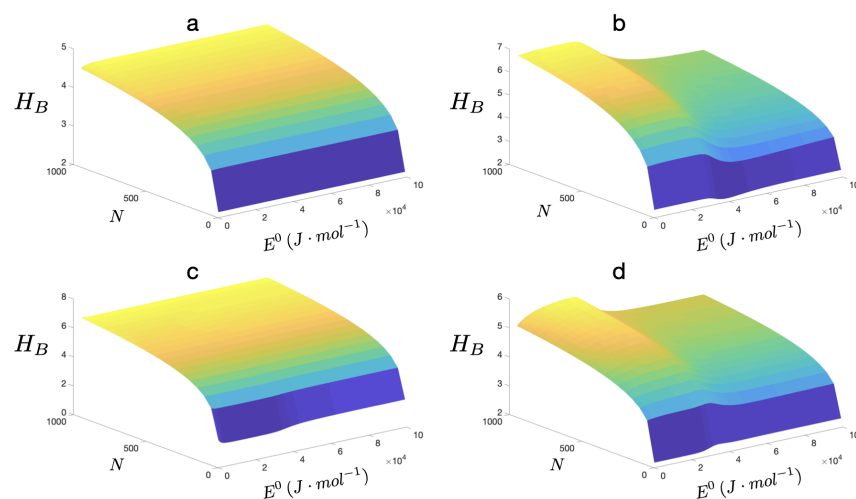

Figure 2: Biological diversity ( $H_B$ ) as a function of the number of consumers ( $N$ ) and  $E^0$ . The graphic **a** shows  $H_B$  corresponding to a distribution of  $\phi_i$  given by equation (20) and model parameters as in equations (21); Graphic **b** shows  $H_B$  corresponding to a distribution of  $E_i^0$  as in equation (23) and model parameters as in equations (24); Graphic **c** shows  $H_B$  corresponding to distributions of  $r_i$  and  $P_i$  as in equations (25) and model parameters as in equations (26); The graphic **d** shows the biological diversity when all the previous distributions are considered simultaneously (model parameters as in equations (27)).

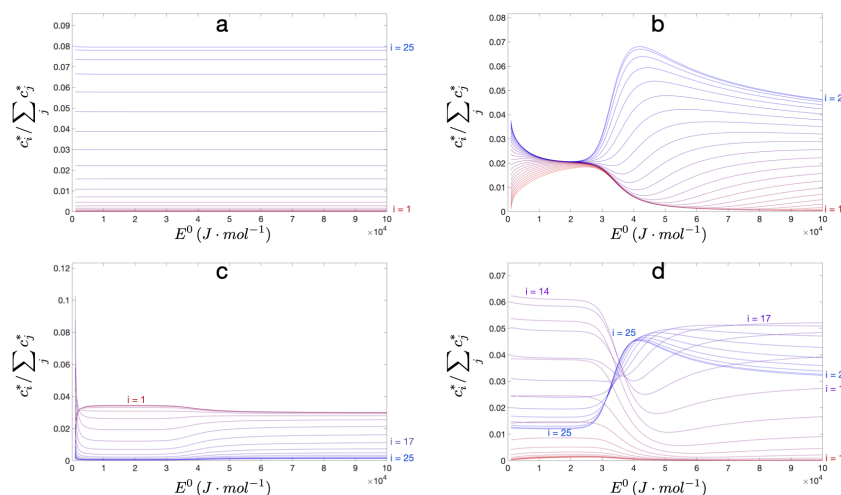

Figure 3: Relative abundance of cells as a function of  $E^0$  for  $N = 50$  consumers. The graphics show the relative abundance corresponding to the model parameters used to produce Fig. 2a, 2b, 2c and 2d, respectively. Due to symmetry, only species labeled 1-25 are shown. The color gradient indicates species label (red - species 1; blue - species 25).

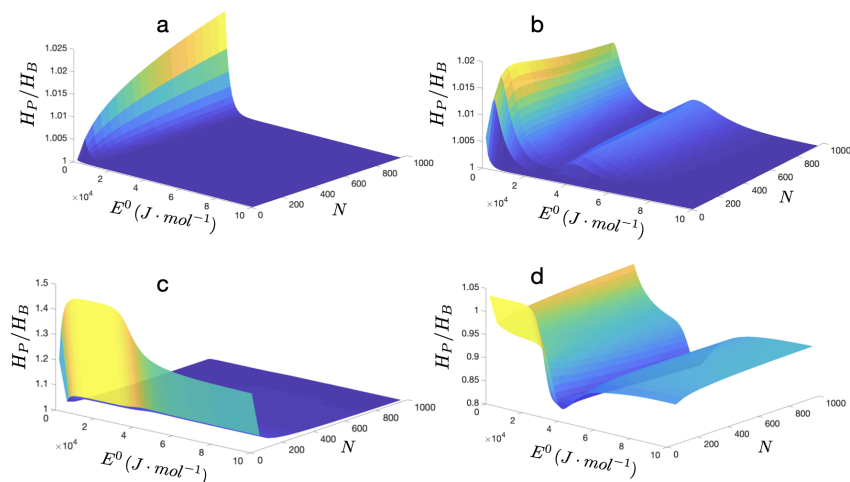

Figure 4: Ratio between power diversity ( $H_P$ ) and biological diversity ( $H_B$ ) as a function of the number of consumers ( $N$ ) and the energy scale ( $E^0$ ). The graphics show the ratio  $H_P/H_B$  obtained with the model parameters used to produce Fig. 2a, 2b, 2c and 2d, respectively.

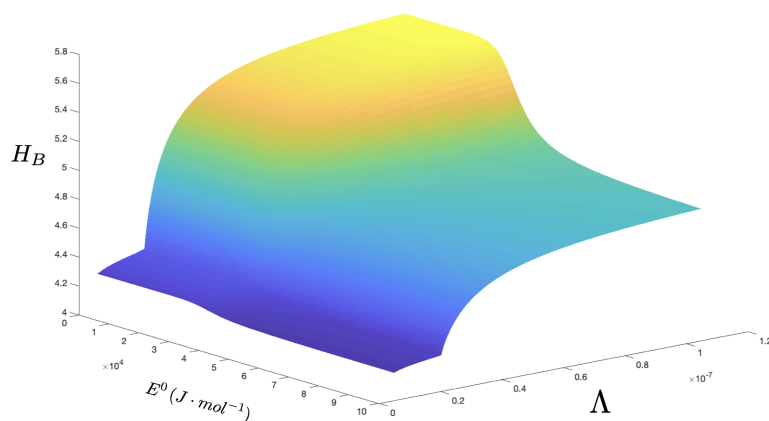

Figure 5: Biological diversity as a function of the energy scale ( $E^0$ ) and a global scaling of the input substrate concentration (i.e.  $\phi_i \mapsto \Lambda\phi_i$ ). The number of specialists is set to  $n = 500$ . We consider distributions for  $\phi_i$ ,  $r_i$  and  $P_i$  given by  $\phi_i/\phi_0 = 10^3 e^{-\frac{(i-n/2)^2}{n/2}} + 1.2$ ,  $r_i/r_{max} = e^{-\frac{(i-n/2)^2}{n/2}} + 1/100$  and  $P_i/P_0 = e^{-\frac{(i-n/2)^2}{n/2}} + 1/20$ . The stoichiometric coefficient is set to 5 for each substrate and the temperature is set to  $T = 300 K$ . The remaining parameters are given the values in Fig. 1b.



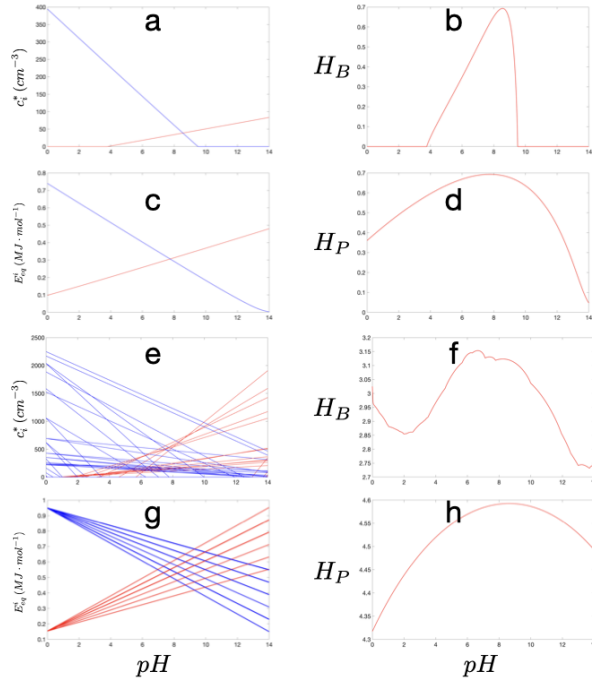

Figure 6: Effect of  $pH$  on biological and power supply diversities. The energy scale is set to  $E^0 = 10^6 J \cdot mol^{-1}$  and the temperature to  $T = 300 K$ . We consider a trade-off between uptake and power maintenance as given in equations (25) while all substrates have the same

input concentration given by  $\phi_0 = 5 \frac{\frac{kP_0}{r_{max}RT}}{W\left(\frac{kP_0}{r_{max}RT} e^{\frac{r_{max}E^0 - P_0}{r_{max}RT}}\right)}$ , where  $W(z)$  is the Lambert

$W$ -function. The remaining parameters are set to the values in Fig. 1b.

The graphic **a** shows the abundance of cells for the case of two specialists where one of them is an  $H^+$ -producer (red line) and the other is an  $H^+$ -consumer (blue line). The stoichiometric coefficients are set as 5 for the producer and 10 for the consumer ; The graphic **b** shows the corresponding biological diversity ; Graphic **c** shows the  $pH$ -dependence of  $E_{eq}^i$  corresponding to the plot **a**. The red line shows  $E_{eq}$  for the  $H^+$ -producer and the blue line corresponds to the  $H^+$ -consumer ; The plot **d** shows the corresponding power supply diversity ( $H_P$ ) ; The graphics **e**, **f**, **g** and **h** show the same as **a**, **b**, **c** and **d**, respectively, but for 100 specialists. Half of them (chosen randomly) are set as  $H^+$ -consumers (red lines) and the other half as  $H^+$ -producers (blue lines). The stoichiometric coefficients vary between 5 and 10 and each specialist is randomly assigned a number within this interval.
